# Supplementary material for: A prototype device for evaporation in batch and flow chemical processes
Source: Royal Society of Chemistry journal article supplement (doi:10.1039/c3gc40967h), 2013-01-01
Supplement: c3gc40967h_2.pdf [file c3gc40967h_2.pdf]

Video File Name: PrototypelnAction\_Toluene\_1mLpermin\_40degres\_xvid.avi

Video Title: Prototype In-Line Evaporator in Action

Video Legend: A prototype in-line evaporation device removing a continuous 1 mL/min flow of toluene at 40 °C. This device has applications in evaporation, concentration, solvent switching, reagent removal and recycling in batch and continuous flow mode chemical synthesis.

Video Keywords: continuous processing, solvent recycling, evaporation, solvent switching, flow chemistry,
